# Supplementary material
Source: PubMed Central journal article supplement (PMC6944434)
Supplement: NIHMS1064842-supplement-suppl.pdf [file NIHMS1064842-supplement-suppl.pdf]

| Gene             | PC3            |         |                        |         |                |         | LNCaP                  |         | Xenografts             |         |
|------------------|----------------|---------|------------------------|---------|----------------|---------|------------------------|---------|------------------------|---------|
|                  | BRCA1/pcDNA3   |         | shBRCA1/shRNA Scramble |         | p53/pcDNA3     |         | shBRCA1/shRNA Scramble |         | shBRCA1/shRNA Scramble |         |
|                  | Fold Induction | p Value | Fold Induction         | p Value | Fold Induction | p Value | Fold Induction         | p Value | Fold Induction         | p Value |
| <b>Cyclin D1</b> | 0.57           | 0.0003  | 1.54                   | 0.2747  | 0.64           | 0.0151  | 1.07                   | 0.3843  | 1.77                   | 0.010   |
| <b>BLM</b>       | 0.27           | 0.0018  | 2.35                   | 0.0692  | 0.37           | 0.0009  | 0.30                   | 0.0048  | 1.61                   | 0.042   |
| <b>BRCA2</b>     | 0.22           | 0.0001  | 1.51                   | 0.4086  | 0.05           | 0.1106  | 0.26                   | 0.0214  | 4.45                   | 0.014   |
| <b>DDB2</b>      | 0.65           | 0.0001  | 0.63                   | 0.0641  | 0.72           | 0.0272  | 1.86                   | 0.0085  | 1.12                   | 0.428   |
| <b>CCNB2</b>     | 0.37           | 0.0000  | 19.36                  | 0.0044  | 1.12           | 0.4393  | 1.02                   | 0.3936  | 0.85                   | 0.190   |
| <b>MAD2L1</b>    | 0.53           | 0.0146  | 0.33                   | 0.0043  | 0.62           | 0.1816  | 2.20                   | 0.0121  | 1.53                   | 0.025   |
| <b>p21</b>       | 0.39           | 0.0185  | 3.50                   | 0.0004  | 2.45           | 0.0200  | 2.18                   | 0.0084  | 1.27                   | 0.200   |
| <b>GADD45A</b>   | 0.89           | 0.3704  | 1.91                   | 0.2788  | 0.19           | 0.0086  | 0.21                   | 0.0010  | 0.98                   | 0.454   |
| <b>FEN1</b>      | 1.29           | 0.1615  | 0.89                   | 0.0326  | 0.49           | 0.0070  | 2.11                   | 0.0005  | 1.05                   | 0.375   |
| <b>GADD153</b>   | 2.11           | 0.0220  | 0.26                   | 0.0401  | 0.69           | 0.0320  | 0.13                   | 0.0003  | 0.88                   | 0.291   |
| <b>H3F3B</b>     | 0.31           | 0.0249  | 1.59                   | 0.0018  | 2.85           | 0.0440  | 1.19                   | 0.1305  | 0.95                   | 0.376   |

Table Supplemental 1
